# Supplementary material for: The multifaceted roles of fatty acid synthesis in cancer
Source: Springer Nature journal article supplement (doi:10.1038/nrc.2016.89), 2016-09-23
Supplement: 41568_2016_BFnrc201689_MOESM275_ESM.pdf [file 41568_2016_BFnrc201689_MOESM275_ESM.pdf]

Supplementary information S1 (table) | Targeting of fatty acid synthesis in cancer using functional genomics and genetics\*

| Target   | Targeting mechanism         | Preclinical model                                                                                                                                                  | Effect                                                                                                                                                                                                                                                                    | References                 |
|----------|-----------------------------|--------------------------------------------------------------------------------------------------------------------------------------------------------------------|---------------------------------------------------------------------------------------------------------------------------------------------------------------------------------------------------------------------------------------------------------------------------|----------------------------|
| FASN     | siRNA, shRNA, gene knockout | Colorectal, breast, prostate and hepatocellular carcinoma cell lines, xenografts, myr-Akt driven liver cancers                                                     | Reduction of proliferation, induction of apoptosis, reduction of tumour growth and metastasis formation (colorectal), reduction of drug resistance, inhibition of tumour development (liver)                                                                              | [1-5]<br>[6]<br>[7]<br>[8] |
| ACLY     | siRNA, shRNA                | Lung cancer cell lines, xenografts; multiple cancer cell lines                                                                                                     | Reduction of tumour growth, induction of differentiation, inhibition of proliferation, induction of apoptosis                                                                                                                                                             | [9-11]                     |
| ACSS2    | siRNA, shRNA, knockout      | Breast and prostate cancer cell lines and xenografts; Genetic deletion in liver cancers driven by expression of SV40-Tag or expression of MYC and deletion of PTEN | Inhibition of proliferation and induction of cell death under metabolic stress, reduced tumour growth (breast, prostate); Inhibition of tumour formation (liver)                                                                                                          | [12]<br>[13]               |
| ACC      | siRNA                       | Prostate and breast cancer cell lines                                                                                                                              | Reduction of proliferation, Induction of apoptosis                                                                                                                                                                                                                        | [2]<br>[3]                 |
| SCD      | siRNA, shRNA                | Colon cancer cell lines; Lung, gastric and liver cell lines and xenografts; breast and prostate cancer cell lines, prostate orthografts                            | Reduction in cell viability, tumour formation (liver); Reduction in cell migration and invasion, induction of apoptosis, inhibition of xenograft tumour growth; Inhibition of proliferation and induction of apoptosis, inhibition of orthotopic tumour growth (prostate) | [14]<br>[15-17]<br>[18]    |
| SREBP1/2 | siRNA, shRNA                | Glioblastoma cell lines and xenografts                                                                                                                             | Induction of ER-stress in reduced serum conditions (rescued by oleic acid), inhibition of tumour growth                                                                                                                                                                   | [19-21]                    |
| SCAP     | shRNA                       | Glioblastoma cell lines and xenografts expressing EGFRvIII                                                                                                         | Reduction of tumour growth in glioblastoma xenografts                                                                                                                                                                                                                     | [22]                       |

\*Studies reporting the effect of targeting enzymes of the fatty acid biosynthesis pathway using genetic strategies. Targeting strategies include short interfering (si)RNA, short hairpin (sh)RNA and gene knockout. Preclinical models were cancer cell lines, xenografts of human cancer cells and genetically engineered mouse models.
